# Supplementary material
Source: MDPI journal article supplement (https://www.mdpi.com/2079-6412/13/4/759)
Supplement: s1 [file s1 › coatings-2289868-supplementary.pdf]

*Additional materials.*

# An Experimental Study on Biochar/Polypyrrole Coating for Blade Anti-icing of Wind Turbines

Xiaoheng Li<sup>1</sup>, Xiaojuan Li<sup>1</sup>, Zhongqiu Mu<sup>1</sup>, Yan Li<sup>1,3,\*</sup>, Fang Feng<sup>2,3,\*</sup>

1 Northeast Agricultural University, college of engineering, Harbin, 150030, China; lixiaoheng0524@163.com (X.L.);lixj66@163.com(X.L.);b19070110@neau.edu.cn(Z.M.);liyanneau@neau.edu.cn(Y.L.);

2 Northeast Agricultural University, college of arts and sciences, Harbin,150030, China;fengfang@neau.edu.cn(F.F.);

3 Key Laboratory of Icing and Anti/De-icing, China Aerodynamics Research and Development Center, Mianyang Sichuan 621000, China

\* Correspondence: liyanneau@neau.edu.cn (Y.L.);Northeast Agricultural University, college of engineering, Harbin, 150030, China;fengfang@neau.edu.cn(F.F.);Northeast Agricultural University, college of Arts and Sciences,Harbin,150030, China.

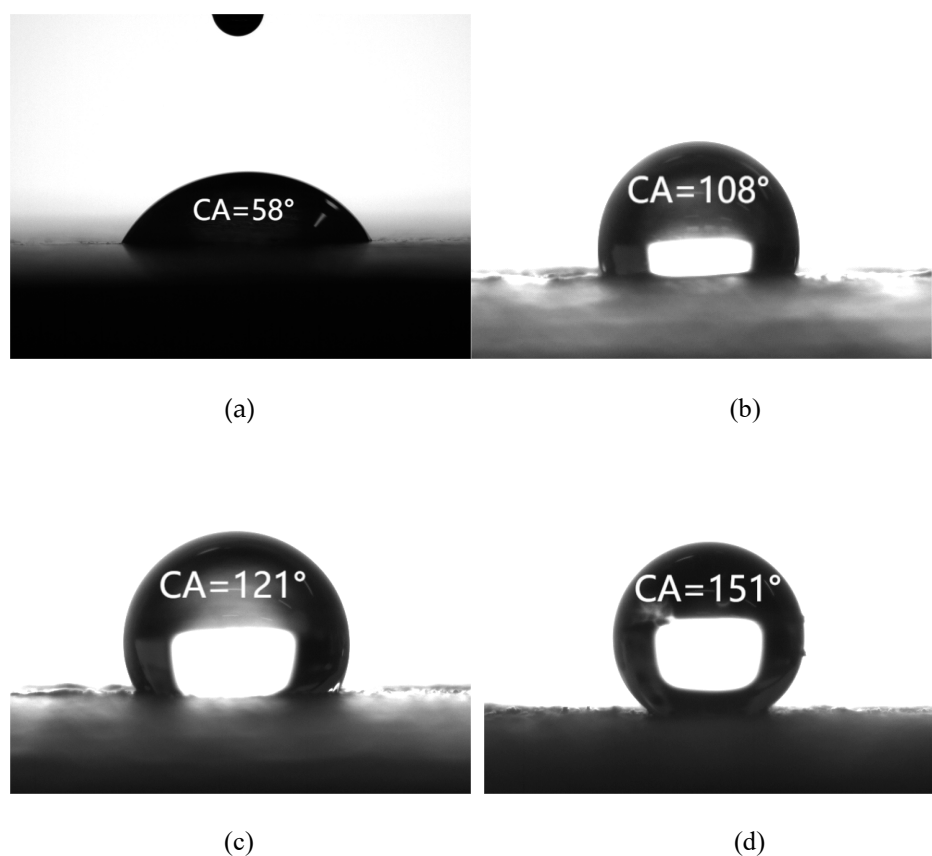

**Figure S1.** Contact angle and water drop shape of (a) uncoated blade surface. (b) PDMS coating, (c)biochar coating, (d) biochar/polypyrrole coating.
